# Supplementary material for: Differences in change blindness to real-life scenes in adults with autism spectrum conditions
Source: PLoS One. 2017 Oct 11;12(10):e0185120. doi: 10.1371/journal.pone.0185120 (PMC5636097; doi:10.1371/journal.pone.0185120)
Supplement: S1 File — This is the data that supports the results of the study. (XLSX) [file pone.0185120.s001.xlsx]

## Sheet: Sheet1
group (1=autism; 2=control)	age	full-scale IQ	AQ	central interest latency (location)	central interest latency (colour)	central interest latency (absence)	marginal interest latency (location)	marginal interest latency (colour)	marginal interest latency (absence)	central interest number of missed changes (location)	central interest number of missed changes (colour)	central interest number of missed changes (absence)	marginal interest number of missed changes (location)	marginal interest number of missed changes (colour)	marginal interest number of missed changes (absence)
1	22	106	47	17868.2	14223.2	8034.9	14982.3	16065.2	13870.9	0	1	2	3	2	3
1	25	131	33	9718.4	9288.9	7625.6	12157.6	15756	11159.8	0	1	0	3	2	1
1	28	134	38	7095.6	8027.4	10870.7	12917.1	13203.6	17047.2	0	0	0	2	0	2
1	22	105	34	10281.4	14588.3	9967.7	15574	12789.9	17219.9	0	1	1	5	3	3
1	53	131	39	17296.1	12290.5	11937.1	18796.2	13785.2	15878.9	0	0	0	5	3	2
1	20	133	37	11473.8	9953.3	11886.9	17829.1	16135.5	17543.7	1	2	1	3	2	5
1	19	119	29	15127.8	7953.9	10536.3	17964.4	13800.4	15752.2	1	1	0	3	2	2
1	57	138	44	11982.3	16282.2	9486.2	17140.8	19110.4	12572.6	0	1	0	4	3	3
1	35	125	38	9767.7	7883.7	7633.6	16791.3	12428.8	15040.1	1	0	0	2	2	3
1	26	116	32	12095.3	10274.9	14427.9	17805.5	14837.6	17594.2	0	0	3	4	3	4
1	50	138	45	11511.4	6770.7	15355.2	12872.1	11297.5	13553.5	1	0	0	4	2	3
1	20	123	46	9108.2	10669.9	15120.8	15251.3	13574.9	21821.4	0	1	2	4	0	2
1	31	126	36	12390.8	9757.7	7485.9	15819.3	13128.9	17276.6	1	0	0	2	1	2
1	19	125	25	4150.1	8373.8	9926.7	12176.9	9425.8	23556	1	1	0	4	4	1
1	37	131	41	18523.5	8956	12523.4	15402.8	12151.7	14892.5	2	0	0	5	1	1
1	35	111	45	12809.1	9744	8258.3	18617	8077.9	14186.6	0	0	0	3	1	1
1	50	109	42	13840.5	12845.5	6342.6	13861.1	17920.2	18868.3	2	1	0	6	3	1
1	35	118	45	7445.1	9909.6	12957.8	11945.6	16736.9	14493.1	2	0	0	3	4	2
1	43	101	36	10486	5013.8	11790.2	19986.2	17863.9	11919.9	0	1	2	5	2	4
1	32	142	33	9021.2	10008.2	9982.5	14318.8	11676.9	18041.2	1	2	0	5	4	2
1	37	138	34	12185	11003.7	5866.4	16094.8	10553.5	12493.7	1	1	0	3	0	1
1	24	130	46	7036.8	9517.2	9634.3	13623.2	16919.7	16293	0	0	0	1	0	2
2	24	125		17081.2	11660.3	11536.2	19679.6	15114.5	16606.1	0	0	0	1	1	1
2	23	123		10237.4	4856	8766.7	15125.1	11234.6	19325.3	2	0	0	3	1	1
2	33	95		17439.5	7620.9	9571.8	18226.4	15458.9	12841	1	0	0	2	1	0
2	34	92		12167.1	7909.9	5638.1	21643.4	11178.5	12331.2	0	1	1	2	2	3
2	44	112		9068.4	12026.3	16084.8	16885.2	20076.9	21960.7	2	2	1	4	4	3
2	61	128		12308.3	12910.7	14050.7	17689.3	13442.7	21611.2	1	1	1	2	0	1
2	22	124		12457.4	5931.9	8559.4	16062.8	13282.7	14761.5	0	1	2	3	0	1
2	26	134		13222	6797.7	10730	17631.4	11981.8	16145.3	2	0	0	2	0	0
2	28	116		21331.5	7443.2	11726.9	19506.8	15913	19434.8	0	2	0	0	1	2
2	20	138		9730.6	8030.2	8223.1	15233.8	14516.2	16061.6	1	1	0	1	0	1
2	60	132		9368.5	11964.4	11554.7	22403.8	24056	17055.3	2	2	2	5	2	4
2	25	125		7200.4	4557	4900.5	18684.4	9904.4	16024.7	3	1	1	0	0	1
2	25	137		9403.9	6943.4	5885	18480.7	11824.4	15035.5	0	0	1	1	0	3
2	26	125		13423.5	7979.8	13202.8	14562.9	15706.1	12424.7	2	1	0	3	0	2
2	26	129		8412	5628.8	9395.3	12099.8	11466.8	20064.8	2	0	0	2	1	0
2	26	136		13674.7	9618.4	11685.7	18386.2	14104.6	13019.2	2	1	0	0	1	0
2	49	141		10872.6	10717.5	10219.4	23283.7	12344.9	19258.1	2	1	0	5	2	2
2	32	127		19843.5	10539.1	18959.6	19927.9	14338.1	21470.2	2	1	2	3	1	2
2	35	109		15462.3	8834.9	10694.4	18617.5	20499.7	15982.4	1	4	1	3	1	1
2	37	115		9305.5	11482.3	11790.3	14447.4	10699.8	21818.7	1	2	0	4	2	2
2	24	121		7397.5	5466.5	8551.4	24583.6	12349.2	14156.2	1	1	0	3	0	1
2	26	103		20606.3	9978.7	9979.6	16189.4	16099.9	19529.8	1	1	1	1	2	1
